# Supplementary material
Source: publisher site journal article supplement (https://www.degruyterbrill.com/publication/isbn/9783486842807/downloadAsset/9783486842807_Inhaltsverzeichnis.pdf)
Supplement: Supplementary file 1 [file 9783486842807_Inhaltsverzeichnis.pdf]

# Inhalt

|                                                                                                                                                        |           |
|--------------------------------------------------------------------------------------------------------------------------------------------------------|-----------|
| <b>Vorwort zur 2. Auflage</b>                                                                                                                          | <b>IX</b> |
| <b>Vorwort zur 1. Auflage</b>                                                                                                                          | <b>XI</b> |
| <b>1 Einordnung der doppelten Buchhaltung in das betriebliche Rechnungswesen</b>                                                                       | <b>1</b>  |
| 1.1 Begriff und grundsätzliche Aufgabe des betrieblichen Rechnungswesens .....                                                                         | 1         |
| 1.2 Die Zweige des betrieblichen Rechnungswesens und ihre speziellen Aufgaben.....                                                                     | 3         |
| 1.3 Die wesentlichsten Unterschiede zwischen der doppelten kaufmännischen und der kameralistischen Buchführung.....                                    | 7         |
| <b>2 Die für das Verständnis der doppelten Buchführung notwendigen Grundbegriffe</b>                                                                   | <b>11</b> |
| 2.1 Einnahme, Ausgabe, Einzahlung, Auszahlung, Aufwand, Ertrag, Aufwendungen und Erträge .....                                                         | 11        |
| 2.2 Vermögen, Schulden, Fremdkapital, Reinvermögen, Eigenkapital, Erfolg, Gewinn, Verlust, Jahresergebnis, Jahresüberschuss und Jahresfehlbetrag ..... | 14        |
| <b>3 Die Bilanz</b>                                                                                                                                    | <b>19</b> |
| 3.1 Inventur und Inventar .....                                                                                                                        | 19        |
| 3.2 Grundaufbau einer Bilanz .....                                                                                                                     | 22        |
| 3.3 Die Distanzrechnung.....                                                                                                                           | 24        |
| <b>4 Das traditionelle System der doppelten Buchführung im Überblick</b>                                                                               | <b>27</b> |
| 4.1 Die Fortschreibung der Bilanz.....                                                                                                                 | 27        |
| 4.2 Die Bilanz und ihre Vorkonten .....                                                                                                                | 31        |
| 4.3 Der Buchungssatz.....                                                                                                                              | 39        |

|          |                                                                                                                   |           |
|----------|-------------------------------------------------------------------------------------------------------------------|-----------|
| 4.4      | Die Erfolgsrechnung (Ergebnisrechnung) .....                                                                      | 41        |
| 4.5      | Der Zusammenhang zwischen Bilanz und Erfolgsrechnung –<br>Betrachtung ohne Vorkonten zur Erfolgsrechnung .....    | 45        |
| 4.6      | Der Zusammenhang zwischen Bilanz und Erfolgsrechnung –<br>Betrachtung mit Vorkonten zur Erfolgsrechnung .....     | 50        |
| <b>5</b> | <b>Wichtige Buchungen bei Anwendung der traditionellen Doppik im<br/>Bereich der Kommunalverwaltung</b> .....     | <b>61</b> |
| 5.1      | Eröffnungsbuchungen .....                                                                                         | 61        |
| 5.2      | Nicht erfolgswirksame Buchungen im Zwei-Komponenten-System .....                                                  | 63        |
| 5.2.1    | Überblick über die im Bereich der Kommunalverwaltung<br>(zunächst) nicht erfolgswirksamen Geschäftsvorfälle ..... | 63        |
| 5.2.2    | Der Kauf von Sachanlagen .....                                                                                    | 64        |
| 5.2.3    | Der Kauf von Werkstoffen .....                                                                                    | 66        |
| 5.2.4    | Aufnahme und Tilgung eines Kredits .....                                                                          | 68        |
| 5.2.5    | Erhaltene Anzahlungen .....                                                                                       | 70        |
| 5.2.6    | Einzahlung von bar eingenommenen Beträgen auf das Bankkonto ....                                                  | 72        |
| 5.2.7    | Erhöhung des Stamm- bzw. Grundkapitals .....                                                                      | 72        |
| 5.3      | Erfolgswirksame Buchungen im Zwei-Komponenten-System .....                                                        | 73        |
| 5.3.1    | Überblick über die wichtigsten erfolgswirksamen Geschäfts-<br>vorfälle im Bereich der Kommunalverwaltung .....    | 73        |
| 5.3.2    | Die Verbuchung des Personalaufwandes .....                                                                        | 74        |
| 5.3.3    | Die Verbuchung des Abschreibungsaufwandes .....                                                                   | 78        |
| 5.3.4    | Die Verbuchung des beim Verbrauch der Werkstoffe entstehenden<br>Aufwandes .....                                  | 87        |
| 5.3.5    | Die Verbuchung des Zins- und Mietaufwandes .....                                                                  | 90        |
| 5.3.6    | Die Verbuchung des mit der Bildung von Rückstellungen<br>verbundenen Aufwandes .....                              | 91        |
| 5.3.7    | Die Verbuchung der Produkterlöse .....                                                                            | 93        |
| 5.3.8    | Die Verbuchung der beim Verkauf von Sachanlagen entstehenden<br>Erlöse .....                                      | 96        |
| 5.4      | Spezielle Buchungen im Zwei-Komponenten-System .....                                                              | 102       |
| 5.4.1    | Überblick über einige spezielle Buchungsfälle .....                                                               | 102       |
| 5.4.2    | Die Buchung von Bonus, Skonto und Rabatt .....                                                                    | 102       |
| 5.4.3    | Buchungen bei der Aktivierung von Eigenleistungen .....                                                           | 111       |
| 5.4.4    | Die Verrechnung von Vorsteuer und berechneter Umsatzsteuer .....                                                  | 114       |
| 5.4.5    | Die Bildung der Rechnungsabgrenzungsposten .....                                                                  | 119       |
| 5.5      | Abschlussbuchungen im Zwei-Komponenten-System .....                                                               | 125       |
| 5.5.1    | Überblick über einige Besonderheiten in Verbindung mit den<br>Abschlussbuchungen .....                            | 125       |
| 5.5.2    | Die Buchung des Erfolges bei einer Einzelunternehmung .....                                                       | 127       |
| 5.5.3    | Die Buchung des Erfolges bei einer Kapitalgesellschaft .....                                                      | 133       |
| 5.5.4    | Die Buchung von Bilanzgewinn und Bilanzverlust .....                                                              | 140       |

|          |                                                                                                          |            |
|----------|----------------------------------------------------------------------------------------------------------|------------|
| 5.5.5    | Die Erstellung des Jahresabschlusses mit Hilfe der Hauptabschlussübersicht .....                         | 147        |
| 5.5.6    | Abschlussbuchungen bei der Ermittlung von Teilergebnissen vor der Ermittlung des Gesamtergebnisses ..... | 154        |
| <b>6</b> | <b>Das Drei-Komponenten-System im Überblick</b>                                                          | <b>161</b> |
| 6.1      | Der grundsätzliche Verbund zwischen Bilanz, Erfolgs- und Finanzrechnung nach Chmielewicz .....           | 161        |
| 6.2      | Das Drei-Komponenten-System mit Zahlungsmittelkonten .....                                               | 164        |
| 6.3      | Das Drei-Komponenten-System mit Finanzrechnungskonten.....                                               | 169        |
| 6.4      | Statistisches Mitführen der Zahlungsmittel- oder Finanzrechnungskonten .....                             | 175        |
| 6.5      | Einsatz des NKF-Kontenrahmens und des NKF-Kontenplans .....                                              | 178        |
| <b>7</b> | <b>Wichtige Buchungen im Drei-Komponenten-System mit dem NKF-Kontenplan</b>                              | <b>191</b> |
| 7.1      | Eröffnungsbuchungen im Drei-Komponenten-System.....                                                      | 191        |
| 7.2      | Nichterfolgswirksame Buchungen im Drei-Komponenten-System.....                                           | 194        |
| 7.2.1    | Der Kauf von Sachanlagen oder von Werkstoffen.....                                                       | 194        |
| 7.2.2    | Aufnahme und Tilgung eines Kredits .....                                                                 | 199        |
| 7.2.3    | Empfangene Investitionszuschüsse .....                                                                   | 200        |
| 7.3      | Erfolgswirksame Buchungen im Drei-Komponenten-System.....                                                | 204        |
| 7.3.1    | Die Verbuchung des Personalaufwandes .....                                                               | 204        |
| 7.3.2    | Die Verbuchung des Abschreibungsaufwandes .....                                                          | 207        |
| 7.3.3    | Die Verbuchung des beim Verbrauch der Werkstoffe entstehenden Aufwandes .....                            | 219        |
| 7.3.4    | Die Verbuchung der Zins- und Mietaufwendungen.....                                                       | 221        |
| 7.3.5    | Die Verbuchung der mit der Bildung von Rückstellungen verbundenen Aufwendungen .....                     | 222        |
| 7.3.6    | Die Verbuchung der Steuererträge .....                                                                   | 228        |
| 7.3.7    | Die Verbuchung der Zuwendungserträge.....                                                                | 231        |
| 7.3.8    | Die Verbuchung der Produkterlöse .....                                                                   | 233        |
| 7.3.9    | Die Verbuchung der beim Verkauf von Sachanlagen entstehenden Erlöse .....                                | 236        |
| 7.4      | Spezielle Buchungen im Drei-Komponenten-System.....                                                      | 240        |
| 7.4.1    | Die Buchung von Bonus, Skonto und Rabatt .....                                                           | 240        |
| 7.4.2    | Buchungen bei der Aktivierung von Eigenleistungen .....                                                  | 247        |
| 7.4.3    | Die Bildung der Rechnungsabgrenzungsposten .....                                                         | 251        |
| 7.5      | Der Jahresabschluss im Drei-Komponenten-System .....                                                     | 255        |
| 7.5.1    | Überblick über einige Besonderheiten des Jahresabschlusses im Drei-Komponenten-System .....              | 255        |

---

|                                                       |                                                                                       |            |
|-------------------------------------------------------|---------------------------------------------------------------------------------------|------------|
| 7.5.2                                                 | Die Buchung der Entstehung und Verwendung des<br>Jahresergebnisses .....              | 256        |
| 7.5.3                                                 | Die Erstellung des Jahresabschlusses mit Hilfe der Haupt-<br>abschlussübersicht ..... | 270        |
| <b>Abbildungsverzeichnis</b>                          |                                                                                       | <b>277</b> |
| <b>Abkürzungsverzeichnis</b>                          |                                                                                       | <b>279</b> |
| <b>Vorschlag für einen Kontenplan im NKF bzw. NKR</b> |                                                                                       | <b>281</b> |
| <b>Literaturverzeichnis</b>                           |                                                                                       | <b>309</b> |
| <b>Stichwortverzeichnis</b>                           |                                                                                       | <b>311</b> |
